# Supplementary material for: Regulation of neural crest cell fate by the retinoic acid and Pparg signalling pathways
Source: Oxford University Press journal article supplement (doi:10.1242/dev.044164), 2010-01-16
Supplement: dev044164figs4.pdf [file dev044164figs4.pdf]

|                       | DMSO                                                                                                           | RA                                                                                                    | DEAB                                                                                                   |
|-----------------------|----------------------------------------------------------------------------------------------------------------|-------------------------------------------------------------------------------------------------------|--------------------------------------------------------------------------------------------------------|
| <i>sox9a</i><br>60hpf | 48-60hpf<br>A<br>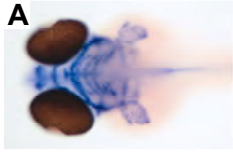             | 48-60hpf<br>B<br>    | 48-60hpf<br>C<br>    |
|                       | <i>myod</i><br>60hpf<br>D<br> | E<br>                | F<br>                |
| Alcian Blue<br>120hpf | 48-120hpf<br>G<br>            | 48-60hpf<br>H<br>    | 48-120hpf<br>I<br>   |
|                       | anti-sarcomere<br>96hpf                                                                                        | 48-96hpf<br>J<br>   | 48-60hpf<br>K<br>    |
| <i>mbp</i><br>100hpf  |                                                                                                                | 48-100hpf<br>M<br> | 48-54hpf<br>N<br>   |
|                       | P<br>                       | Q<br>              | R<br>              |
| live larvae<br>124hpf | 48-124hpf<br>S<br>          | 48-54hpf<br>T<br>  | 48-124hpf<br>U<br> |
|                       | V<br>                       | W<br>              | X<br>              |
