# Supplementary material for: Regulation of neural crest cell fate by the retinoic acid and Pparg signalling pathways
Source: Oxford University Press journal article supplement (doi:10.1242/dev.044164), 2010-01-16
Supplement: dev044164tables1.pdf [file dev044164tables1.pdf]

**Table S1. Alizarin Red after GW9662 treatment**

|                     | Control ( <i>n</i> =15) | GW9662 ( <i>n</i> =15) |
|---------------------|-------------------------|------------------------|
| Ceratohyal          | 0                       | 4                      |
| Hyomandibular       | 0                       | 8                      |
| Maxilla and dentary | 0                       | 7                      |

GW9662 at 5  $\mu$ M 48-120 hpf.
