# Supplementary material for: Regulation of neural crest cell fate by the retinoic acid and Pparg signalling pathways
Source: Oxford University Press journal article supplement (doi:10.1242/dev.044164), 2010-01-16
Supplement: dev044164tables2.pdf [file dev044164tables2.pdf]

**Table S2. Alizarin Red after RA pulse treatment**

|                     | Control (n=20) | 48-54 hpf (n=20) |
|---------------------|----------------|------------------|
| Branchiostegal ray  | 20             | 20               |
| Opercle             | 20             | 20               |
| Cleithrum           | 20             | 20               |
| Entopterygoid       | 18             | 3                |
| Hyomandibular       | 17             | 18               |
| Ceratohyal          | 19             | 18               |
| Maxilla and dentary | 20             | 1                |

RA 0.5  $\mu$ M pulse 48-54 hpf (fix at 144 hpf).
