# Supplementary material for: Regulation of neural crest cell fate by the retinoic acid and Pparg signalling pathways
Source: Oxford University Press journal article supplement (doi:10.1242/dev.044164), 2010-01-16
Supplement: dev044164tables3.pdf [file dev044164tables3.pdf]

**Table S3. Alizarin Red after DEAB pulse treatment**

|                     | Control ( <i>n</i> =14) | 48-54 hpf ( <i>n</i> =15) | 48-60 hpf ( <i>n</i> =15) | 48-72 hpf ( <i>n</i> =10) |
|---------------------|-------------------------|---------------------------|---------------------------|---------------------------|
| Branchiostegal ray  | 14                      | 15                        | 15                        | 10                        |
| Opercle             | 14                      | 15                        | 15                        | 10                        |
| Cleithrum           | 14                      | 15                        | 15                        | 10                        |
| Entopterygoid       | 5                       | 11                        | 12                        | 5                         |
| Hyomandibular       | 2                       | 9                         | 11                        | 5                         |
| Ceratohyal          | 0                       | 6                         | 11                        | 3                         |
| Maxilla and dentary | 0                       | 10                        | 12                        | 7                         |

DEAB 10  $\mu$ M pulse (fix at 120 hpf).
