# Supplementary figures and images for: Regulation of neural crest cell fate by the retinoic acid and Pparg signalling pathways
Source: Oxford University Press journal article supplement (doi:10.1242/dev.044164), 2010-01-16

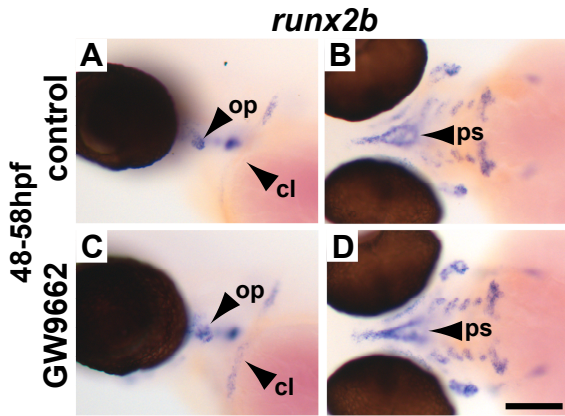

Supplement: dev044164figs1.pdf [file dev044164figs1.pdf]

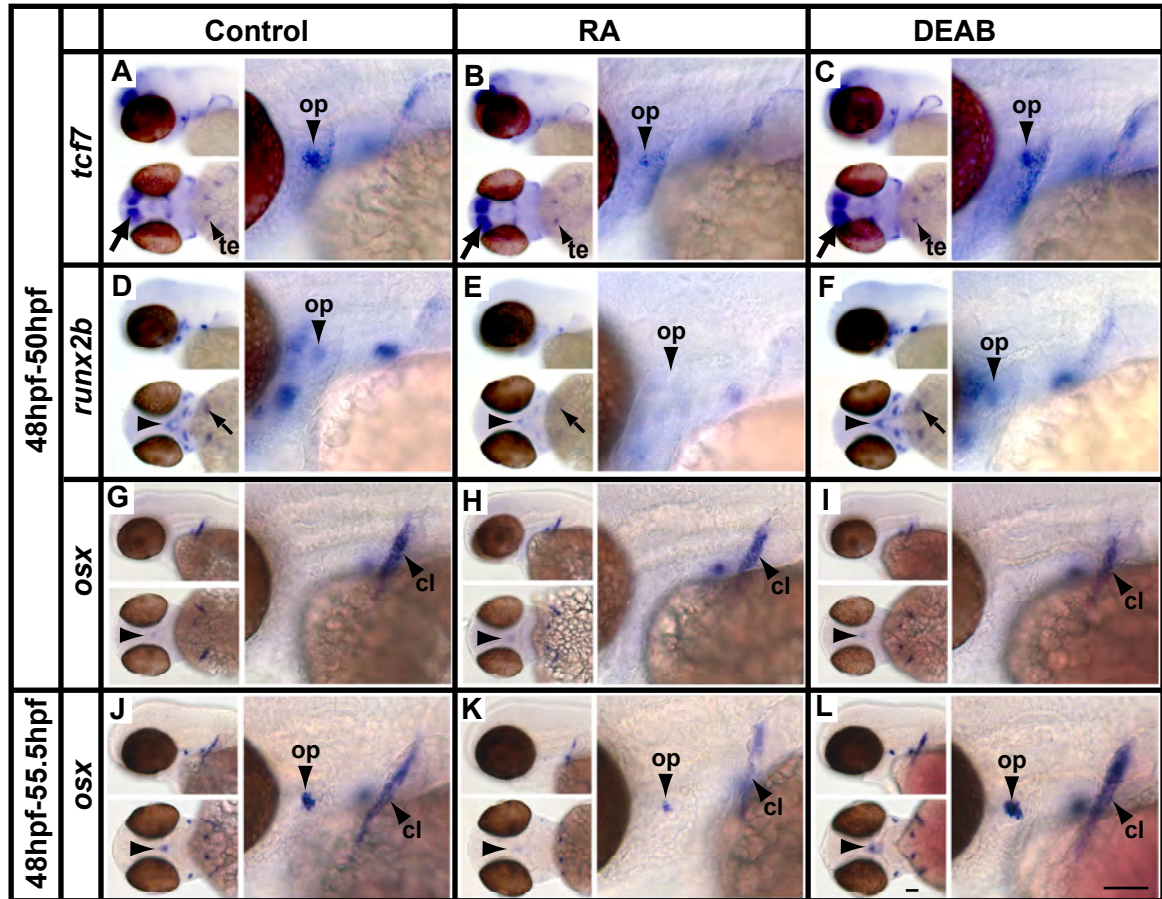

Supplement: dev044164figs2.pdf [file dev044164figs2.pdf]

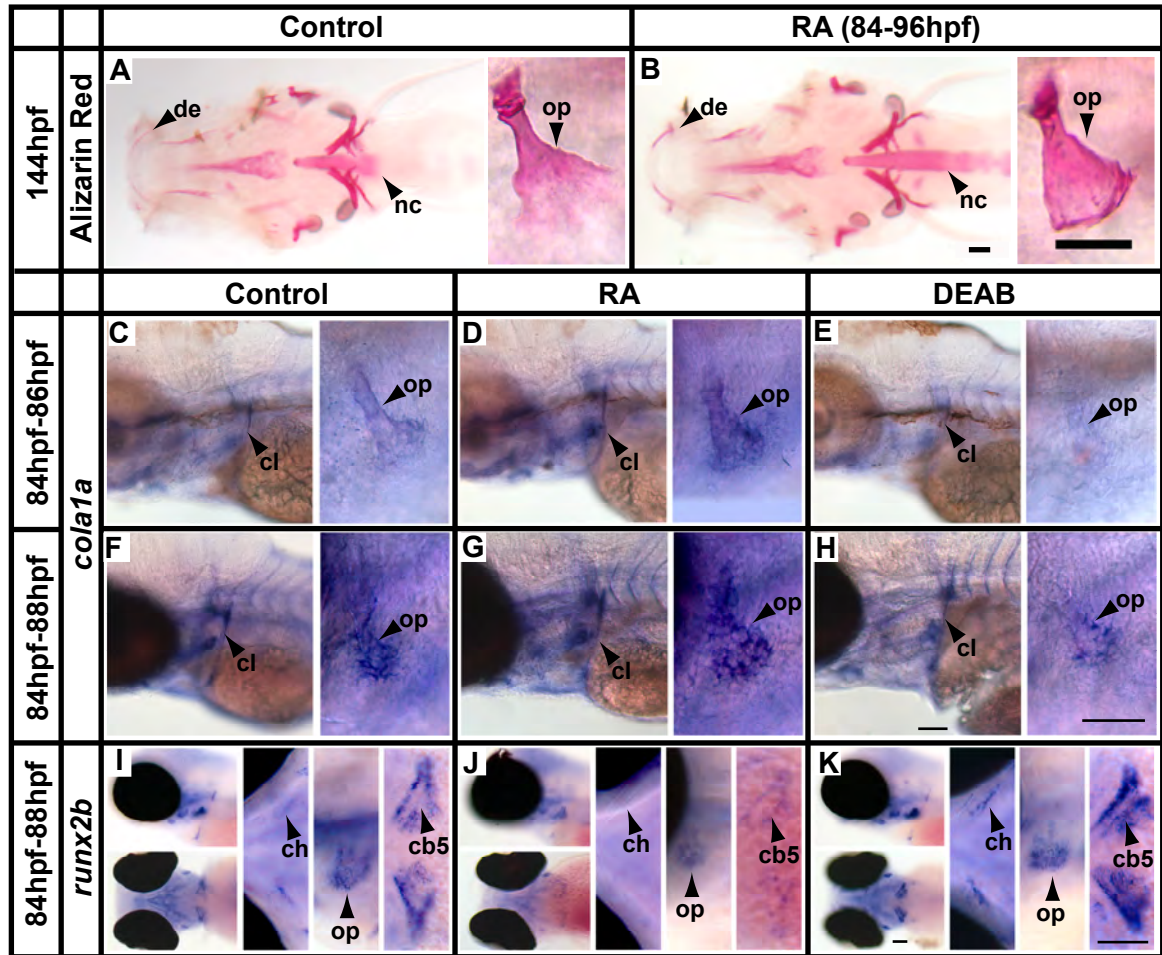

Supplement: dev044164figs3.pdf [file dev044164figs3.pdf]
